# Supplementary material for: Conformational transitions in the Ramachandran space of amino acids using the dynamic rotational isomeric state (DRIS) model
Source: Royal Society of Chemistry journal article supplement (doi:10.1039/c3mb70433e), 2014-01-02
Supplement: c3mb70433e.pdf [file c3mb70433e.pdf]

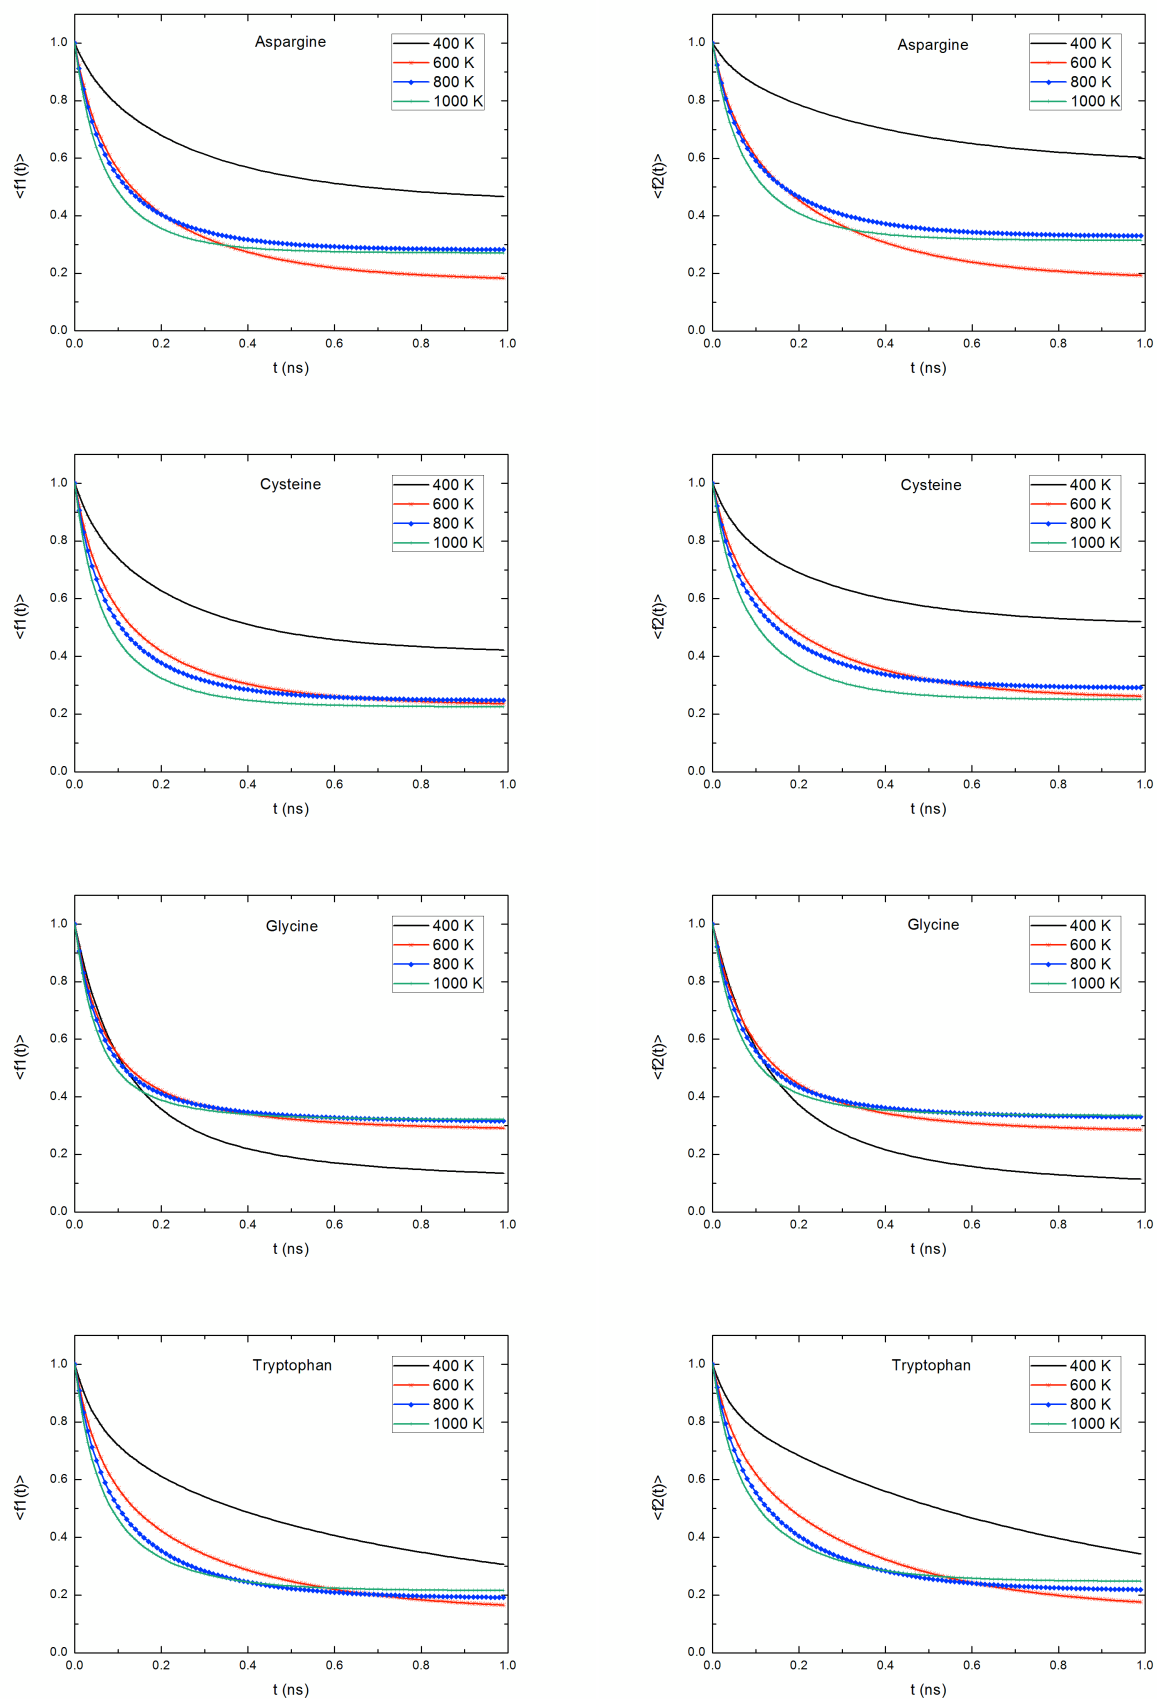

Figure S1. The mean dynamic properties  $\langle f_1(t) \rangle$  and  $\langle f_2(t) \rangle$  for Asn, Cys, Gly, Trp at 400, 600, 800 and 1000 Kelvin.
